Individuals with a spinal cord injury who use a manual wheelchair spend more of their day in humeral elevation levels associated with tendon compression

Brianna M. Goodwin<sup>1,2</sup>, Stephen M. Cain<sup>3</sup>, Meegan G. Van Straaten<sup>4</sup>, Emma Fortune<sup>1,2</sup>, and Melissa M. B. Morrow<sup>1,2</sup>

- (1) Division of Health Care Policy and Research, Department of Health Sciences Research, Mayo Clinic, Mayo Clinic, Rochester, MN, USA
- (2) Robert D. and Patricia E. Kern Center for the Science of Health Care Delivery, Mayo Clinic, Rochester, MN, USA
- (3) Department of Mechanical Engineering, University of Michigan, Ann Arbor, MI, USA
- (4) Department of Physical Medicine and Rehabilitation, Mayo Clinic, Rochester, MN, USA

Corresponding Author:

Melissa (Missy) M. B. Morrow  
200 First Street SW  
Rochester, MN 55905  
507-266-3400  
[morrow.melissa@mayo.edu](mailto:morrow.melissa@mayo.edu)

Submission type: Original Article

Word Count: 3874

Key words: Spinal cord injury, kinematics, wearable technology, free-living data, inertial measurement unit, humeral elevation workspace, wearable sensors

1 **Abstract (word count: 244/250):**

2 Shoulder pain and pathology are extremely common for individuals with spinal cord injuries (SCI) who  
3 use manual wheelchairs (MWC). Although risky humeral kinematics have been measured during  
4 wheelchair-based activities performed in the lab, little is known about arm motion in the free-living  
5 environment. The purpose of this study was to measure the humeral elevation workspace throughout a  
6 typical day for individuals with SCI and able-bodied matched controls. Thirty-four individuals with SCI  
7 who use a MWC ( $42.7 \pm 12.7$  years of age, 28 males/6 females, C6-L1) and 34 age-and sex-matched  
8 controls were enrolled. Participants wore three inertial measurement units (IMU) on their upper arms  
9 and torso for one to two days. Humeral elevation angles were estimated and the percentage of time  
10 individuals spent in five elevation bins ( $0-30^\circ$ ,  $30-60^\circ$ ,  $60-90^\circ$ ,  $90-120^\circ$ , and  $120-180^\circ$ ) were calculated.  
11 For both arms, the SCI cohort spent a significantly lower percentage of the day in  $0-30^\circ$  of humeral  
12 elevation (Dominant: SCI=  $15.7 \pm 12.6\%$ , Control=  $32.1 \pm 15.6\%$ ,  $p < 0.0001$ ; Non-Dominant: SCI=  
13  $21.9 \pm 17.8\%$ , Control=  $34.3 \pm 15.5\%$ ,  $p = 0.001$ ) and a significantly higher percentage of time in elevations  
14 associated with tendon compression ( $30-60^\circ$  of humeral elevation, Dominant: SCI=  $62.8 \pm 14.4\%$ , Control=  
15  $49.9.1 \pm 13.0\%$ ,  $p < 0.0001$ ; Non-Dominant: SCI=  $58.8 \pm 14.9\%$ , Control=  $48.3 \pm 13.6\%$ ,  $p = 0.003$ ) than controls.  
16 The increased percentage of time individuals with SCI spent in elevations associated with tendon  
17 compression may contribute to increased shoulder pathology. Characterizing the humeral elevation  
18 workspace utilized throughout a typical day may help in understanding the increased prevalence of  
19 shoulder pain and pathology in individuals with SCI who use MWCs.

## 20 **Introduction**

21           Shoulder pain is the most common site of musculoskeletal pain in adults with spinal cord  
22 injuries (SCI) who use manual wheelchairs (MWC) and its existence can significantly limit a person's  
23 functional abilities (1). Shoulder pain is reported in 37-70% of individuals with SCI who use a MWC (2-7).  
24 This differs vastly from the 2.9% of the general able-bodied population who experience shoulder pain  
25 (8). Although shoulder pain can develop any time after SCI, it is most commonly developed within the  
26 first five years (9) and often lasts longer than one year (3). Of the MWC users who experience pain, up to  
27 93% have pathological signs on MRI (10), most commonly in the supraspinatus tendon (11).

28           In general, non-traumatic supraspinatus tendon tears in the shoulder have been thought to be  
29 caused by a combination of intrinsic and extrinsic factors (12). However, these effects can be  
30 exacerbated by overuse (13). One extrinsic factor is the narrowing of the subacromial space which  
31 causes compression of the supraspinatus tendons under the coracoacromial arch, and is hypothesized to  
32 lead to increased tendon pathology and pain (14, 15). Individualized musculoskeletal models utilizing  
33 MRI have estimated the risk of supraspinatus tendon compression through various humeral planes and  
34 workspaces (16). The magnitude of glenohumeral elevation was the greatest kinematic predictor of  
35 tendon compression risk, followed by the specific plane of elevation. Results showed the supraspinatus  
36 tendon had the greatest risk of compression at humerothoracic elevations angles between 30-60° (15).  
37 Biplane fluoroscopic imaging of the shoulder joint during dynamic motion has shown similar results and  
38 demonstrated that at higher humeral elevations, as the humeral head rotates posteriorly, the  
39 supraspinatus tendon may no longer be under the coracoacromial arch, therefore, not at risk of  
40 compression (17). Understanding where tendon compression risk occurs can provide insights when  
41 interpreting the humeral elevation workspace of activities of daily living.

42 MWC propulsion, transfers, and other wheelchair-based activities of daily living have been  
43 investigated in laboratory environments to characterize the upper extremity kinematics that pose a risk  
44 for shoulder tendon compression (18-20). Although in-laboratory data provide accurate quantifications  
45 of how MWC users utilize their arms to complete specific activities, it is unable to quantify the exposure  
46 to potentially risky postures in daily-living. To understand the daily exposure to risky shoulder motion,  
47 inertial measurement units (IMUs) can be used to measure the angular velocity and acceleration of body  
48 segments throughout an entire day in environments of daily living. IMU-based methods for quantifying  
49 shoulder movement show good agreement with position-based motion capture and have been used to  
50 quantify shoulder elevation angles; however a limited number of studies have applied these methods to  
51 free-living full-day collections (21-26). To the best of our knowledge no study has utilized these  
52 methods to understand the humeral elevation workspace of MWC users throughout an entire day.

53 The purpose of this study was to use IMUs to measure the humeral elevation workspace  
54 throughout a typical day for individuals with SCI who use a MWC and compare it to matched, able-  
55 bodied controls. Comparison to cohorts allows for understanding of how humeral elevation exposure  
56 during daily life differs when the option to use the lower extremities for weight bearing and mobility is  
57 removed. This study also aimed to understand the effects of years of MWC use, pain, sex, and level of  
58 SCI on the humeral elevation workspace. Due to the increased prevalence of shoulder pain and  
59 pathology in MWC users compared to able-bodied controls (11) and the potential role that humeral  
60 elevation has on shoulder tendon compression (15), we hypothesized that MWC users would utilize a  
61 different humeral elevation workspace than able-bodied adults. Specifically, we hypothesized  
62 individuals with SCI would spend a higher percentage of time at elevation angles associated with tendon  
63 compression risk. Understanding the humeral elevation workspace of individuals with SCI may  
64 contribute to understanding why increased levels of shoulder pain and pathology occur for this  
65 population.

## 66 **Methods**

### 67 *Participant Enrollment*

68           This study was approved by the Mayo Clinic Institutional Review Board. Individuals with an SCI  
69 who used a MWC as their main mode of mobility were recruited through querying medical records and  
70 care providers of local clinics. Sex- and age- ( $\pm 2.5$  years) matched able-bodied controls were recruited  
71 through email distribution lists and classified ads. Participants for both cohorts were considered for  
72 inclusion in the study if they were between 18-70 years of age and had functional range of motion at  
73 both shoulders. Functional range of motion was defined as active humeral thoracic flexion, abduction of  
74 at least 150° and the ability of the participant to touch the opposite shoulder, the back of his/her neck  
75 and his/her low back. Prior to accrual to the study a licensed physical therapist (MVS) performed a  
76 screening physical exam to confirm inclusion and exclusion criteria. Participants with SCI were excluded  
77 if they self-reported previous diagnoses of complete supraspinatus tendon tears bilaterally. Controls  
78 were excluded with a known unilateral or bilateral complete supraspinatus tendon tear(s). Additionally,  
79 participants in both cohorts were excluded if there were conditions/factors which might have hindered  
80 protocol adherence and controls were also excluded if they had any musculoskeletal or neurological  
81 disorder which might have impacted shoulder health or changed the individual's ability to walk  
82 independently.

### 83 *Questionnaires and IMU Instrumentation*

84           Upon enrollment, participants attended an in-lab visit. A licensed physical therapist screened  
85 participants for eligibility and informed consent was obtained. Participants self-reported their hand  
86 dominance and were asked if they had pain on either or both shoulders. All participants completed the  
87 Disabilities of the Arm, Shoulder, and Hand (DASH) questionnaire (27) for both right and left arms. The  
88 DASH encompasses 30 questions which ask individuals to rate their difficulty, pain, and satisfaction

89 when accomplishing specific tasks on a 5 point scale. Scores range from 0-100, with 0 indicating no  
90 difficulty and 100 indicating the most difficulty, pain, and dissatisfaction. The DASH has been shown to  
91 be reliable and to have high validity (28). Additionally, the SCI cohort filled out the Wheelchair User  
92 Shoulder Pain Index (WUSPI) for both the right and left shoulders. To complete the WUSPI, participants  
93 were asked to rate their shoulder pain when completing 15 tasks on a visual analog scale between “no  
94 pain” and “worst pain ever experienced” (29). Possible scores ranged from 0 (no pain) and 150 (worst  
95 pain ever experienced in all categories). The WUSPI is valid and reliable for this population (30).  
96 Although we acknowledge that the DASH and WUSPI were designed to be filled out once, as part of a  
97 larger study, both surveys were filled out for both arms to evaluate pain and function as it related to  
98 each arm

99 Participants were given three wireless IMUs (Emerald or Opal, APDM, Inc., Portland, OR). Each  
100 IMU contained a 3-axis accelerometer ( $\pm 200$  g), 3-axis gyroscope ( $\pm 2000^\circ/s$ ), and 3-axis magnetometer  
101 ( $\pm 8$  Gauss). The three IMUs remained synchronized via a proprietary wireless protocol, recorded data at  
102 128 Hz and saved the data to internal storage. In order to maximize the consistency of IMU placement  
103 and functional calibration movements across participants, written handouts, video guides and in-person  
104 instruction were provided. Participants were instructed to wear one IMU on each lateral upper arm and  
105 one on the anterior of the torso; IMUs were secured on the body with elastic and Velcro straps. Each  
106 IMU was labeled with the wear location (left arm, right arm, or torso) and an arrow indicating the  
107 proper mounting orientation. Participants were instructed to wear the sensors during the entire length  
108 of two typical days, excluding bathing and swimming, and take them off before going to bed. Both  
109 cohorts were asked to perform their regular daily routines; participants in the control cohort did not use  
110 MWCs. Upon donning the sensors for a day, participants performed a set of functional calibration  
111 postures (Figure1, Appendix A). Due to the collection of multiple days of data, participants were

112 responsible for charging the IMUs overnight using a provided charging station. After the data collection,  
113 participants returned the sensors with a pre-paid mailer or in person to the study staff.

#### 114 *Data Processing*

115 Data were downloaded through Motion Studio (APDM, Inc., Portland, OR) and outputs included  
116 estimates of the orientations of each IMU relative to an inertial frame (Figure 2). The orientation  
117 estimates were derived from the combined acceleration and angular velocity data, rather than only the  
118 acceleration data. This was chosen as the most accurate method due to challenges separating the  
119 acceleration into gravitational and the body caused components, especially at increased movement  
120 speeds (31-34). Further, orientation estimates were calculated without magnetometer data due to the  
121 unknown and likely non-uniform magnetic fields present throughout field data collections. While the  
122 orientation algorithm used by APDM is proprietary, sensor fusion methods (e.g. Kalman filters) used to  
123 estimate IMU orientation from raw sensor data are well understood and well documented in the  
124 literature (21, 31, 35). Custom MATLAB (Mathworks, Natick, MA) code was written to calculate  
125 orientations of anatomical axes relative to IMU-fixed reference frames using data collecting during each  
126 participant's functional calibration postures and movements (Figure 1; Appendix A). Orientation of a  
127 given body segment (upper arm or thorax) in an inertial (world) reference frame was then estimated  
128 using the orientation of the IMU and the orientation of the anatomical axes relative to the IMU-fixed  
129 reference frame (Appendix B). Humeral elevation and thorax deviation angles were defined as the angle  
130 between the long axis of the body segment (defined from the function calibration) and vertical; these  
131 angles are only dependent on the estimated direction of gravity relative to the body segment and,  
132 therefore, are drift-free metrics for quantifying body segment motions. The calculated humeral  
133 elevation angles range between 0-180°, with 0° indicating the arm was down and perfectly aligned with  
134 gravity and 180° indicating the arm was raised overhead and aligned with gravity. These methods have

135 previously been validated in unpublished data where five individuals with SCI performed 10 reaching  
136 tasks. The absolute error and percent of error when compared to the gold standard (electromagnetic  
137 system) were  $-0.06 \pm 1.12^\circ$  and  $-1.44 \pm 1.28\%$ , respectively, for the range of motion. The absolute error  
138 and percent of error for the maximum elevation achieved during each reach were  $2.59 \pm 2.47^\circ$  and  
139  $2.04 \pm 2.47\%$ , respectively.

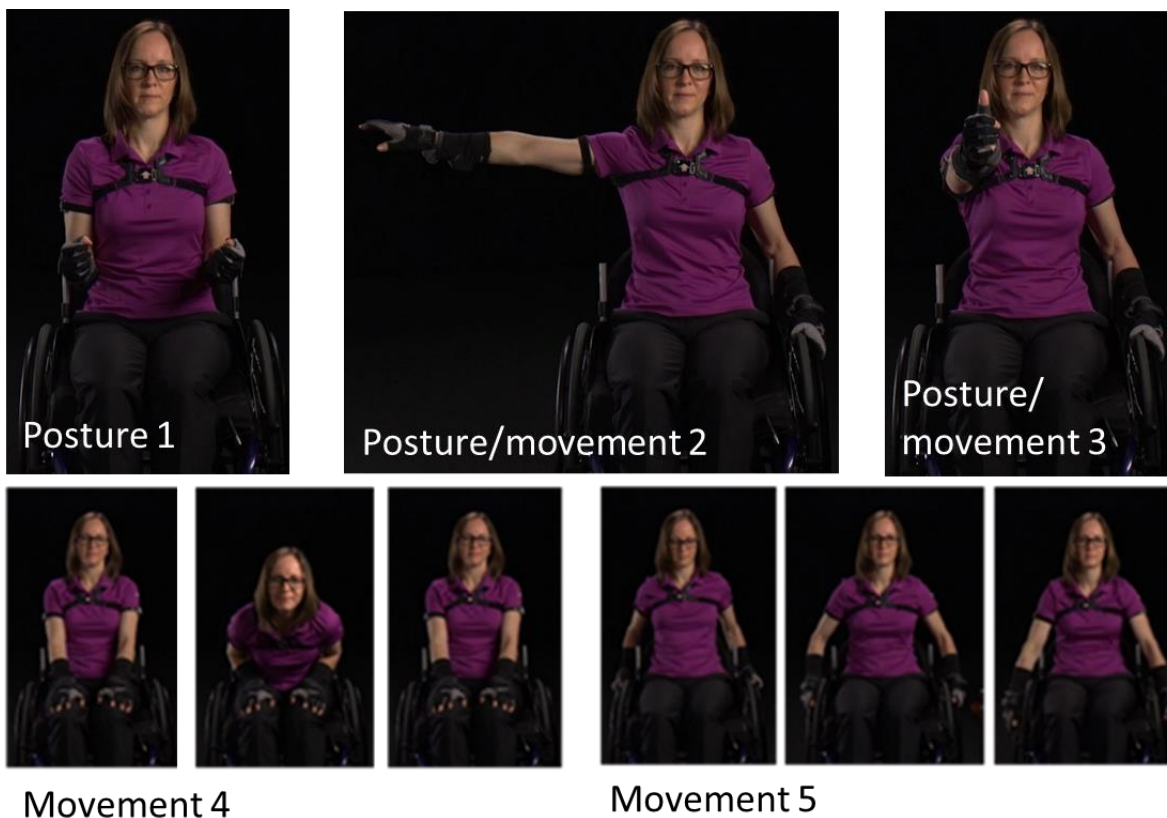

140  
141 **Figure 1: Functional calibration used to align IMU's with the body. Postures included static upright neutral posture with**  
142 **upper arms resting against the thorax (posture 1), static and dynamic arm t-pose/movement (shoulder abduction = 90°,**  
143 **posture 2), static and dynamic flexion pose/movement (shoulder flexion = 90°, posture 3), dynamic flexion and extension of**  
144 **the torso (movement 4), and simulated wheelchair use or walking (movement 5). Postures 2 and 3 were completed for both**  
145 **the right and left arms separately. (Note: The individual pictured is a co-author).**



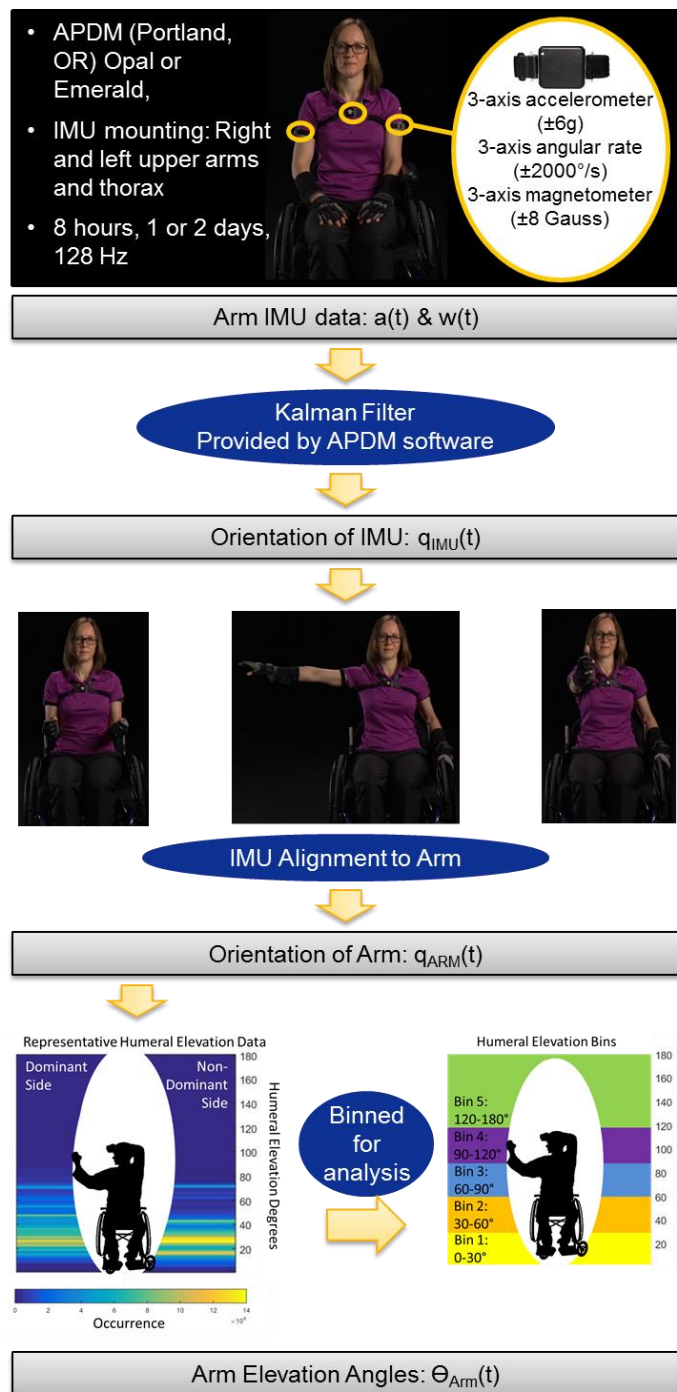

146

147 **Figure 2: Data processing workflow including data collected, IMU orientation, IMU alignment to arm through calibration**  
 148 **postures, representative data, and humeral elevation bins. The percentage of time spent in each bin was calculated and used**  
 149 **for analysis. (Note: The individual pictured is a co-author).**

150 It is important to note that humerothoracic elevation angles and elevation planes relative to the

151 thorax were not calculated as these calculations require accounting for relative drift between the

152 orientation estimates of arm and torso IMUs. Correcting this drift is an active research area and requires  
153 a joint specific approach (36, 37). Therefore, in our analysis, data in which the thorax deviation angle  
154 was more than 30° were eliminated in order to allow humeral elevation angles to be interpreted  
155 similarly to humerothoracic elevation angles; 30° was selected based on a sensitivity analysis performed  
156 during a prior study.

157 The percentage of daily wear time each participant spent in five humeral elevation bins were  
158 calculated (0-30°, 30-60°, 60-90°, 90-120°, and 120-180°). The bin sizes were chosen as a means to  
159 combine three theories: 1) a painful arc of motion occurs between 60-120° of arm abduction (38), 2)  
160 Rapid Upper Limb Assessment (RULA) which bins risky arm postures between 0-20°, 20-45°, 45-90°, and  
161 >90° (39), and 3) the subacromial risk area of 30-60° (15).

162 Periods of non-wear were determined using methods from Lugade and colleagues (2014) and  
163 were excluded from data analysis. Data were also excluded from analysis if the functional calibration  
164 postures were not completed properly or if at least eight hours of data were not collected after the  
165 elimination of non-wear time. Data were included if one or two complete days were collected; if two  
166 days were included all data were combined before the calculation of the percent of time in humeral  
167 elevation bins.

### 168 *Statistical Analysis*

169 Multivariate analyses of variance (MANOVA) were used to test for the main effects of cohort,  
170 sex, age, pain (measured by the WUSPI and DASH), level of injury, and years of MWC use on both  
171 dominant and non-dominant side humeral elevation bins ( $\alpha=0.05$ ). To test for level of injury the SCI  
172 cohort was divided into three groups based on their injury level; cervical (C6-C8), high/mid thoracic (T1-  
173 T8), and low thoracic/lumbar (T9-L1). Within groups, analysis of variance (ANOVA) was used to test for  
174 the main effect of humeral elevation bin for both arms. When significant main effects were observed,

175 post hoc paired t-tests were performed. A Bonferroni correction factor was used to adjust the alpha  
 176 level from 0.05 to 0.01 due to the calculation of time in five bins.

## 177 Results

178 Thirty-four participants with SCI who used a MWC, and 34 age ( $\pm 2.5$  years) and sex matched,  
 179 able-bodied adults were enrolled (Table 1). There were no statistical differences between the cohort's  
 180 self-reported weight, height, and dominant hand.

181 Table 1: Participant Demographics

|                                               | SCI                              | Control                          | P-value |
|-----------------------------------------------|----------------------------------|----------------------------------|---------|
| <b>Age</b>                                    | 42.7 +/- 12.7<br>(22.6 - 63.3)   | 42.6 +/- 12.5<br>(24.3 - 61.0)   | 0.776   |
| <b>Sex</b>                                    | 28 males/6<br>females            | 28 males/6 females               | -       |
| <b>Self-reported weight (kg)</b>              | 80.7 +/- 17.2<br>(54.0 - 145.1)  | 81.6 +/- 17.5<br>(56.7 - 149.7)  | 0.6822  |
| <b>Self-reported height (cm)</b>              | 177.4 +/- 7.6<br>(160.0 - 195.6) | 178.4 +/- 9.5<br>(160.0 - 205.7) | 0.417   |
| <b>Injury Level</b>                           |                                  |                                  |         |
| Cervical (C6-C8)                              | 7                                | -                                | -       |
| High/mid thoracic (T1-T8)                     | 16                               |                                  |         |
| Low thoracic/lumbar (T9-L1)                   | 11                               |                                  |         |
| <b>Years of manual wheelchair use (years)</b> | 11.5 +/- 10.7<br>(0.5 - 36.0)    | -                                | -       |
| <b>Dominant arm</b>                           | 27 right/7 left                  | 32 right/2 left                  | 0.058   |
| <b>DASH (dominant arm)</b>                    | 15.2 +/- 17.5<br>(0 - 71.7)      | 1.3 +/- 2.9<br>(0 - 15)          | <0.0001 |
| <b>DASH (non-dominant arm)</b>                | 13.6 +/- 14.2<br>(0 - 51.7)      | 1.1 +/- 3.3<br>(0 - 15)          | <0.0001 |
| <b>WUSPI (dominant arm)</b>                   | 12.7 +/- 20.4<br>(0 - 71.2)      | -                                | -       |
| <b>WUSPI (non-dominant arm)</b>               | 10.8 +/- 16.2<br>(0 - 71.6)      | -                                | -       |
| <b>Presence of pain</b>                       | 26                               | 9                                | <0.0001 |
| <b>Number of participants</b>                 | 34                               | 34                               | -       |

182

## 183 Excluded Data

184 One control was excluded from the study due to complete supraspinatus tear; however no SCI  
 185 participants were excluded due to the previous diagnosis of a complete supraspinatus tear. Seven pairs

186 of data were excluded from the analysis due to exclusion criteria (Figure 3). Data were collected for an  
 187 average (SD) of 11.4(2.1) and 11.9(1.3) hours for the SCI and control cohorts, respectively. Additionally,  
 188 on average 18.3(14.0) and 28.0(10.3) percent of the day was excluded because the trunk was at or over  
 189 30° for the SCI and control cohorts, respectively.

190 *Humeral Elevation Workspace*

191 There was a main effect of cohort across humeral elevation bins on both dominant and non-  
 192 dominant sides ( $p < 0.0001$ ). Additionally, there was a main effect of humeral elevation bin for both  
 193 cohorts and arms (dominant:  $p < 0.0001$ , non-dominant:  $p = 0.005$ , Figure 4). Individuals with SCI spent  
 194 significantly more time in 30-60° of humeral elevation than all other elevations bins on both their  
 195 dominant and non-dominant sides ( $p < 0.001$ , Table 2). The SCI cohort spent 63% and 59% of their daily  
 196 wear time (approximately 7 hours per day) at these elevations on their dominant and non-dominant  
 197 sides, respectively. The controls also spent the greatest amount of daily wear time in this elevation bin  
 198 at 50% and 48% on their dominant and non-dominant arm respectively, which was significantly lower  
 199 than the SCI cohort for both arms (dominant:  $p < 0.0001$ , non-dominant:  $p = 0.003$ , Table 2).

200 **Table 2: The average (SD) percentage of the day individuals with SCI and matched able-bodied controls spent in five humeral**  
 201 **elevation bins throughout one or two days**

| <b>Bin</b>         | <b>SCI<br/>Dominant<br/>Hand<br/>Percentage<br/>(%)</b> | <b>Control<br/>Dominant<br/>Hand<br/>Percentage<br/>(%)</b> | <b>P-Value</b> | <b>SCI Non-<br/>Dominant<br/>Arm<br/>Percentage<br/>(%)</b> | <b>Control<br/>Non-<br/>Dominant<br/>Arm<br/>Percentage<br/>(%)</b> | <b>P-Value</b> |
|--------------------|---------------------------------------------------------|-------------------------------------------------------------|----------------|-------------------------------------------------------------|---------------------------------------------------------------------|----------------|
| <b>0-30°</b>       | 15.7 (12.6)                                             | 32.1 (15.6)                                                 | <0.0001        | 21.9 (17.8)                                                 | 34.3 (15.5)                                                         | 0.001          |
| <b>30-60°</b>      | 62.8 (14.4)                                             | 49.9 (13.0)                                                 | <0.0001        | 58.8 (14.9)                                                 | 48.3 (13.6)                                                         | 0.003          |
| <b>60-90°</b>      | 18.4 (11.0)                                             | 16.2 (9.6)                                                  | 0.410          | 17.7 (14.8)                                                 | 15.6 (6.2)                                                          | 0.430          |
| <b>90-120°</b>     | 2.8 (5.3)                                               | 1.4 (1.0)                                                   | 0.145          | 1.4 (1.4)                                                   | 1.6 (1.2)                                                           | 0.589          |
| <b>120° - 180°</b> | 0.2 (0.4)                                               | 0.4 (0.8)                                                   | 0.320          | 0.2 (0.5)                                                   | 0.3 (0.3)                                                           | 0.430          |

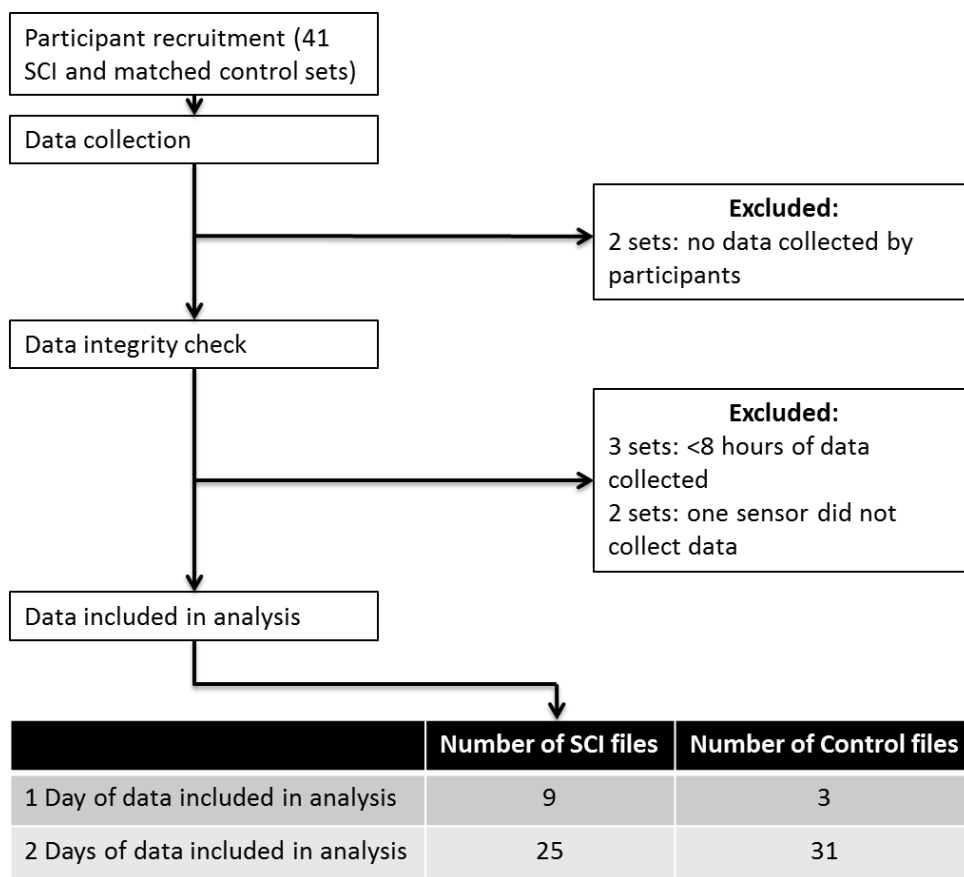

202

203 **Figure 3: Data exclusion processes. Data was excluded if either SCI or control did not collect data, a minimum of 8 hours of**  
204 **data were not collected, or one sensor malfunctioned. Data was included in analysis if one or two days of data was collected.**

205 For the SCI cohort, the second largest percentage of time was spent in 60-90° of humeral  
206 elevation (approximately 20% of their day for both arms). Controls spent their second largest  
207 percentage of time in 0-30° of elevation for both arms, which was significantly higher than the amount  
208 of time the SCI cohort spent in this elevation bin ( $p < 0.001$ ). Individuals with SCI spent comparable  
209 amounts of time in 0-30° and 60-90° of elevation, while controls spent significantly more time in 0-30°  
210 than 60-90° of humeral elevation on the dominant ( $p < 0.001$ ) and non-dominant ( $p < 0.0001$ ) sides.

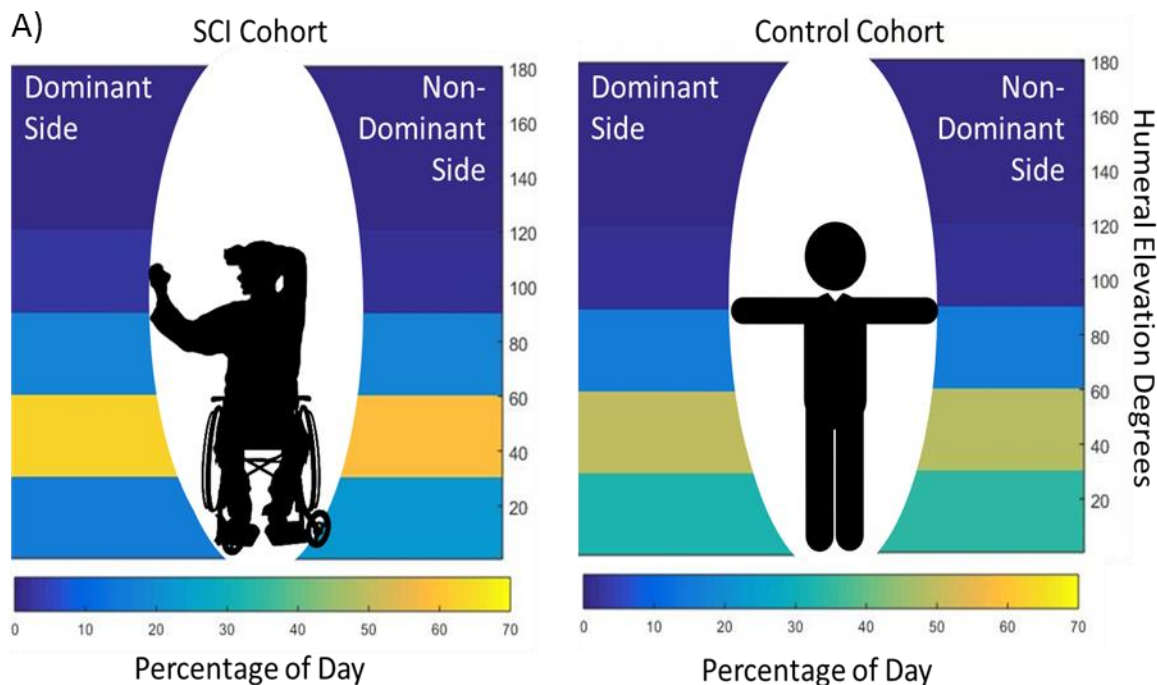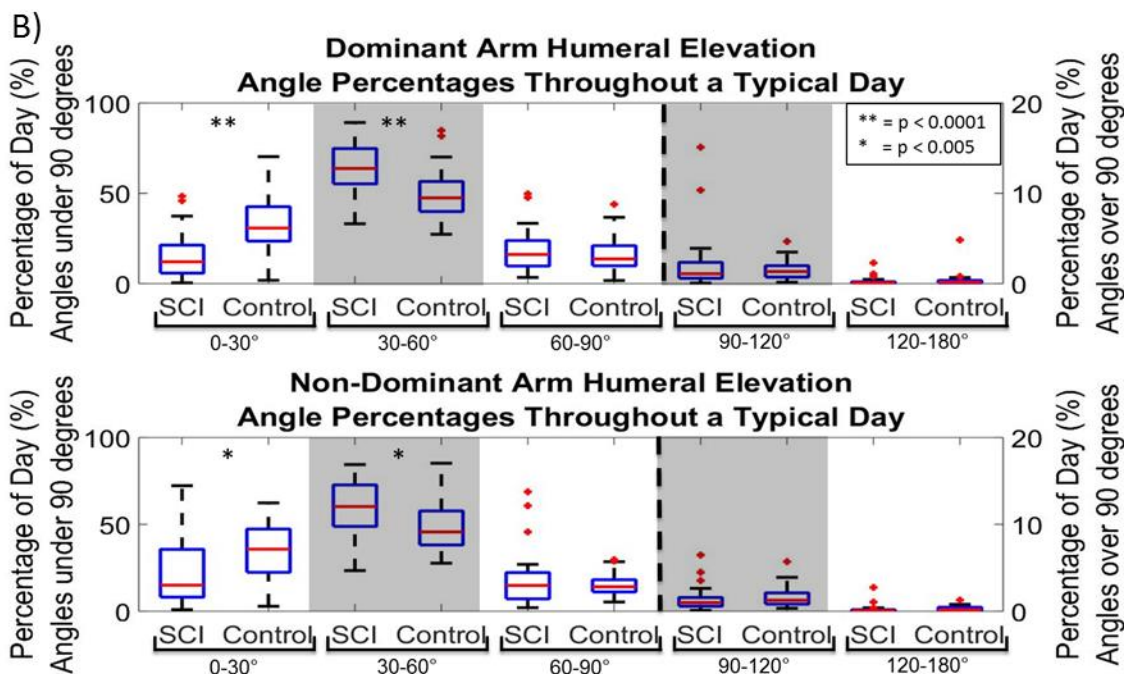

211

212 Figure 4: A) The average percentage of time throughout a typical day individuals in the SCI and control cohorts spent in 0-30°,  
 213 30-60°, 60-90°, 90-120°, and 120-180° of humeral elevation for their dominant and non-dominant sides. B) Percentage of  
 214 time throughout a typical day individuals in the SCI and control cohorts spent in 0-30°, 30-60°, 60-90°, 90-120°, and 120-180°  
 215 of humeral elevation for their dominant arm (top) and their non-dominant arm (bottom). For each boxplot the central line  
 216 (red) represents the median, the edges of the box are the 25<sup>th</sup> and 75<sup>th</sup> percentiles, and the error bars extend the most  
 217 extreme data points not considered outliers and, the outliers are denoted by red +. \*\* indicates p < 0.0001 and \* indicates p  
 218 < 0.005.

219            On average, participants in both cohorts spent less than 3% of their day (<25 minutes) in  
220            elevations over 90° for both arms. There were no significant differences between cohorts for the 60-90°  
221            90-120° and >120° humeral elevation bins or between dominant and non-dominant arms for each cohort  
222            and each elevation bin.

### 223    *Pain*

224            Pain, measured by the DASH and WUSPI, did not have a significant effect on the percentage of  
225            time an individual spent in any humeral elevation bins for both dominant and non-dominant arms  
226            ( $p>0.01$ ).

### 227    *Sex, Age, Injury level, and Years of MWC Use*

228            There were no main effects of sex (Table 3), age (Table 4), injury level (Table 3), or years of  
229            MWC Use (Table 4) on either arm ( $p>0.01$ ).

230

231 **Table 3: The percentage of time individuals spent in humeral elevation bins based on their injury level and sex**

| <b>Injury Level</b>     |             |                   |                     |         |
|-------------------------|-------------|-------------------|---------------------|---------|
|                         | Cervical    | High/mid thoracic | Low thoracic/lumbar | P-Value |
| <b>Dominant Arm</b>     |             |                   |                     |         |
| <b>0-30°</b>            | 20.3 ± 12.5 | 15.5 ± 14.0       | 13.1 ± 11.4         | 0.521   |
| <b>30-60°</b>           | 57.4 ± 11.0 | 63.0 ± 15.9       | 66.0 ± 15.1         | 0.493   |
| <b>60-90°</b>           | 18.0 ± 9.7  | 18.4 ± 12.4       | 18.8 ± 11.2         | 0.988   |
| <b>90-120°</b>          | 3.7 ± 5.2   | 3.0 ± 6.9         | 1.8 ± 2.9           | 0.769   |
| <b>120-180°</b>         | 0.6 ± 0.8   | 0.1 ± 0.2         | 0.2 ± 0.2           | 0.050   |
| <b>Non-Dominant Arm</b> |             |                   |                     |         |
| <b>0-30°</b>            | 24.7 ± 16.9 | 20.6 ± 21.1       | 22.1 ± 15.0         | 0.888   |
| <b>30-60°</b>           | 56.9 ± 11.3 | 59.4 ± 18.6       | 59.0 ± 12.6         | 0.937   |
| <b>60-90°</b>           | 16.5 ± 9.1  | 18.9 ± 19.        | 16.6 ± 11.4         | 0.910   |
| <b>90-120°</b>          | 1.6 ± 1.2   | 1.0 ± 1.0         | 1.9 ± 1.9           | 0.275   |
| <b>120-180°</b>         | 0.3 ± 0.4   | 0.06 ± 0.09       | 0.4 ± 0.8           | 0.266   |
| <b>Sex</b>              |             |                   |                     |         |
|                         | Male        | Female            | P - Value           |         |
| <b>Dominant Arm</b>     |             |                   |                     |         |
| <b>0-30°</b>            | 14.4 ± 12.  | 21.9 ± 15.3       | 0.199               |         |
| <b>30-60°</b>           | 62.8 ± 14.4 | 63.2 ± 17.4       | 0.950               |         |
| <b>60-90°</b>           | 19.4 ± 11.7 | 13.8 ± 8.0        | 0.267               |         |
| <b>90-120°</b>          | 3.2 ± 5.9   | 1.0 ± 0.8         | 0.381               |         |
| <b>120-180°</b>         | 0.2 ± 0.5   | 0.2 ± 0.3         | 0.814               |         |
| <b>Non-Dominant Arm</b> |             |                   |                     |         |
| <b>0-30°</b>            | 20.4 ± 18.3 | 29.0 ± 16.2       | 0.294               |         |
| <b>30-60°</b>           | 59.1 ± 15.6 | 57.4 ± 14.2       | 0.814               |         |
| <b>60-90°</b>           | 18.8 ± 16.1 | 12.2 ± 7.6        | 0.337               |         |
| <b>90-120°</b>          | 1.5 ± 1.5   | 1.2 ± 0.8         | 0.691               |         |
| <b>120-180°</b>         | 0.2 ± 0.5   | 0.1 ± 0.1         | 0.565               |         |

232  
233 **Table 4: The linear regression values for the percentage of time individuals spent in humeral elevation bins based on age and**  
234 **years of MWC use**

|                         | <b>Age</b>     |         | <b>Years of MWC use</b> |         |
|-------------------------|----------------|---------|-------------------------|---------|
|                         | R <sup>2</sup> | P-Value | R <sup>2</sup>          | P-Value |
| <b>Dominant Arm</b>     |                |         |                         |         |
| <b>0-30°</b>            | 0.104          | 0.06    | 0.009                   | 0.60    |
| <b>30-60°</b>           | 0.037          | 0.28    | 0.000                   | 0.97    |
| <b>60-90°</b>           | 0.013          | 0.41    | 0.008                   | 0.62    |
| <b>90-120°</b>          | 0.000          | 0.94    | 0.002                   | 0.82    |
| <b>120-180°</b>         | 0.002          | 0.79    | 0.047                   | 0.22    |
| <b>Non-Dominant Arm</b> |                |         |                         |         |
| <b>0-30°</b>            | 0.027          | 0.35    | 0.001                   | 0.84    |
| <b>30-60°</b>           | 0.002          | 0.81    | 0.009                   | 0.58    |
| <b>60-90°</b>           | 0.025          | 0.37    | 0.007                   | 0.65    |
| <b>90-120°</b>          | 0.000          | 0.88    | 0.054                   | 0.19    |
| <b>120-180°</b>         | 0.049          | 0.21    | 0.023                   | 0.39    |



## 236 Discussion

237 This study aimed to understand the humeral elevation workspace utilized throughout a typical  
238 day by individuals with SCI who use a MWC. These results were compared to controls to better  
239 understand why individuals with SCI are at a higher risk for both pain and tendon pathology after  
240 increased MWC use (11). Both individuals with SCI and controls spent the majority of their day (~80%) in  
241 elevation angles between 0 and 60°. However, individuals with SCI spent significantly more time in  
242 humeral elevations associated with supraspinatus tendon compression (30-60°) than controls. There  
243 was no evidence of the effect of injury level, years of MWC use, age, or sex on the humeral elevation  
244 workspace individuals with SCI spend time in.

245 With the growing capabilities of wearable technology, many SCI-specific algorithms have been  
246 created and validated to accompany and enhance data captured in a lab setting (41). Many of the  
247 studies using wearable technology to understand movement of MWC users have focused specifically on  
248 wheelchair propulsion and use (42, 43), with less focus on understanding humeral elevation angles or  
249 overuse of the arms of MWC users. The data presented in the current study supplements data collected  
250 in a laboratory setting and other free-living MWC use metrics by providing lengths of exposure to risky  
251 postures in the free living environment.

252 Recently it has been suggested that compression of the supraspinatus tendon occurs at low  
253 elevation angles. Giphart, van der Meijden (17) suggested that subacromial impingement syndrome  
254 occurs below 70° of humeral elevation and the minimum distance between the footprint of the  
255 supraspinatus tendon and greater tuberosity occurred between 36° and 65° of humeral elevation.  
256 Additionally, using individualized bone models (from MRI) and group averaged kinematics, Lawrence,  
257 Schlangen (15) used musculoskeletal simulation models to suggest the minimum distance between the  
258 coracoacromial arch and humerus occurred at 42° of humerothoracic elevation. Our results show that

259 individuals with SCI who use a MWC spent significantly more time than controls in a similar range of  
260 humeral elevations (30-60°). This difference could be in part due to differences in the arm elevation  
261 workspace during mobility. During MWC propulsion the humeral elevation required is between 25 and  
262 55° at a self-selected speed (44, 45); however during walking the humeral elevation angles required are  
263 much lower (46). The difference in humeral elevation during mobility likely is not the only contributor to  
264 this increase, as MWC users move about 3 km less than able-bodied individuals and only spend a small  
265 amount of their day actually propelling themselves; estimates range from 16 to 54 minutes per day (42,  
266 47). Another contributing factor to this discrepancy may be wheelchair setup; for example MWC users  
267 may not place their arms in a neutral resting position (0-30°) due to the location of their arm rest. In  
268 addition to the humeral elevation workspace differing during propulsion for MWC users and walking for  
269 able-bodied individuals, the loading of the shoulder is also different during these two tasks and likely  
270 contributes to the increase in pathology in MWC users. Further, additional data collections and analyses  
271 are needed to fully understand the clinical implications of the differences in humeral elevation between  
272 the wheelchair users and able-bodied control group. Future work will determine more details about  
273 these differences such as the activity levels and/or participant activities while in 30-60° of humeral  
274 elevation. These future analyses can guide whether a reduction of time spent in these elevation angles  
275 should be considered as a possible intervention to prevent or treat shoulder dysfunction.

276           Capturing a holistic view of an individual's exposure to potentially risky humeral elevation is  
277 dependent on many factors including occupation and activities performed throughout a day. A study  
278 looking at 10 able-bodied elderly adults using only accelerometry data found that less than 4% of an  
279 individual's day was spent in elevations above 90°, with the average elevation angle occurring at 40°  
280 (48). These results are very similar to the data presented in the current study for both cohorts; about 3%  
281 of the day was spent in elevations over 90°. Previous reports have suggested that extended periods of  
282 time in overhead motion may be the cause of increased shoulder pain. Our results paired with the most

283 recent modeling and imaging data may suggest that injury to the supraspinatus tendon due to tendon  
284 compression of the SCI cohort occurs due to increased time between 30-60° of humeral elevations.  
285 Further, pain in higher elevation angles may be caused by other mechanisms (15). Continuing to map  
286 this workspace for individuals with SCI who use a MWC while they perform specific tasks (i.e., propulsion  
287 or transfers) may help us to further understand daily risk exposures and the contribution of specific  
288 tasks. Although out of the scope of this study, activity detection is an active area of research for our  
289 group (47).

290 Multiple challenges exist when using unsupervised real-world IMU data. First, accounting for  
291 and correcting the drift of IMU-based body segment orientation estimates is a common challenge in  
292 understanding the relative orientation of body segments (i.e. joint angles), especially for extended data  
293 collections. The current algorithms utilized in this study are not able to take the plane of motion into  
294 account; 30° of humeral elevation in front of the body, to the side, or behind would all be interpreted as  
295 30° of humeral elevation and are indistinguishable. Therefore, the data presented only used the angle of  
296 the humerus relative to vertical (humeral elevation angle) and not the trunk (humerothoracic angle).  
297 This was compensated for by eliminating humeral elevation time points where the trunk angle was at or  
298 over 30° of tilt; participants may have been leaning over or lying down. On average about 10% more  
299 data was eliminated from the control data sets than the SCI data sites, indicating the controls had more  
300 variability and movement of their trunk than the SCI cohort. Even with these limitations, the methods  
301 used in this study to estimate sensor orientation and humeral elevation are more accurate than other  
302 methods using only acceleration data (31-34).

303 There are limitations with the data presented in this study to consider. Previous studies have  
304 found that up to four days of data collection are needed to represent propulsion trends consistent  
305 throughout a MWC user's daily life (49). Only one or two days of data were collected for participants in

306 this study due to participant availability and adherence to the protocol. We attempted to compensate  
307 for this by asking participants to wear the sensors on ‘typical days.’ The calibration protocol used in this  
308 study enabled us to determine humeral elevations without an in-lab calibration. As participants  
309 performed the calibration protocol unsupervised, it’s possible that there could be errors induced by  
310 incorrect neutral and 90° calibration postures. The data presented here were binned into 30° ranges  
311 below 120° of humeral elevation; however, creating bins with different boundaries may affect the  
312 results. Appendix C shows the average percent of time in 10° bins. Additionally, there are other factors  
313 beyond humeral elevation that contribute to shoulder injury in the SCI population including increased  
314 load on the shoulder due to MWC propulsion, body transfers, and repetitive motion. Loading of the  
315 shoulder although not measured in this study, has an important role in the increased pathology and pain  
316 for MWC users.

## 317 **Conclusions**

318 This study aimed to understand the humeral elevation workspace throughout a typical day of  
319 individuals with SCI who use a MWC and compare it to the workspace of age- and sex-matched controls.  
320 Our data suggest that individuals with SCI who use a MWC may spend more time in a potentially risky  
321 humeral elevation range (30-60°) than the controls. The findings from this study do not support an  
322 effect of age, sex, pain, injury level, or years since injury on the humeral elevation workspace for adults  
323 with SCI who use a MWC. Future work should expand the understanding of loading of the upper  
324 extremity during daily life and characterize more in-depth information about shoulder workspace and  
325 activities of daily living across injury levels and groups with and without pain and pathology.

## 326 **Conflicts of Interest:**

327 There are no conflicts of interest to disclose.

328 **Acknowledgements:**

329 This publication was made possible by funding from the National Institutes of Health (grant no. R01  
330 HD84423-01), Mayo Clinic Robert D. and Patricia E. Kern Center for the Science of Health Care Delivery,  
331 and the National Center for Advancing Translational Sciences (UL1 TR002377).

332 **References:**

- 333 1. Cooper RA, Boninger ML, Robertson RN. Repetitive Strain Injury Among Manual Wheelchair  
334 Users. Team Rehab Report. 1998;9(2):35-8.
- 335 2. Curtis KA, Drysdale GA, Lanza RD, Kolber M, Vitolo RS, West R. Shoulder pain in wheelchair users  
336 with tetraplegia and paraplegia. Archives of physical medicine and rehabilitation. 1999;80(4):453-7.
- 337 3. Alm M, Saraste H, Norrbrink C. Shoulder pain in persons with thoracic spinal cord injury:  
338 prevalence and characteristics. Journal of rehabilitation medicine. 2008;40(4):277-83.
- 339 4. Samuelsson K, Tropp H, Gerdle B. Shoulder pain and its consequences in paraplegic spinal cord-  
340 injured, wheelchair users. Spinal cord. 2004;42(1):41.
- 341 5. Dalyan M, Cardenas D, Gerard B. Upper extremity pain after spinal cord injury. Spinal cord.  
342 1999;37(3):191-5.
- 343 6. Divanoglou A, Augutis M, Sveinsson T, Hultling C, Levi R. Self-reported health problems and  
344 prioritized goals in community-dwelling individuals with spinal cord injury in Sweden. Journal of  
345 rehabilitation medicine. 2018;50(10):872-8.
- 346 7. Dyson-Hudson TA, Kirshblum SC. Shoulder pain in chronic spinal cord injury, part 1:  
347 epidemiology, etiology, and pathomechanics. Taylor & Francis; 2004.
- 348 8. Greving K, Dorrestijn O, Winters J, Groenhof F, Van der Meer K, Stevens M, et al. Incidence,  
349 prevalence, and consultation rates of shoulder complaints in general practice. Scandinavian journal of  
350 rheumatology. 2012;41(2):150-5.
- 351 9. Sie IH, Waters RL, Adkins RH, Gellman H. Upper extremity pain in the postrehabilitation spinal  
352 cord injured patient. Archives of physical medicine and rehabilitation. 1992;73(1):44-8.
- 353 10. Giner-Pascual M, Alcanyis-Alberola M, González LM, Aguilar-Rodríguez M, Querol F. Shoulder  
354 pain in cases of spinal injury: influence of the position of the wheelchair seat. International Journal of  
355 Rehabilitation Research. 2011;34(4):282-9.
- 356 11. Akbar M, Balean G, Brunner M, Seyler TM, Bruckner T, Munzinger J, et al. Prevalence of rotator  
357 cuff tear in paraplegic patients compared with controls. JBJS. 2010;92(1):23-30.
- 358 12. Seitz AL, McClure PW, Finucane S, Boardman III ND, Michener LA. Mechanisms of rotator cuff  
359 tendinopathy: intrinsic, extrinsic, or both? Clinical biomechanics. 2011;26(1):1-12.
- 360 13. Carpenter JE, Flanagan CL, Thomopoulos S, Yian EH, Soslowsky LJ. The effects of overuse  
361 combined with intrinsic or extrinsic alterations in an animal model of rotator cuff tendinosis. The  
362 American journal of sports medicine. 1998;26(6):801-7.
- 363 14. Braman JP, Zhao KD, Lawrence RL, Harrison AK, Ludewig PM. Shoulder impingement revisited:  
364 evolution of diagnostic understanding in orthopedic surgery and physical therapy. Medical & biological  
365 engineering & computing. 2014;52(3):211-9.

- 366 15. Lawrence RL, Schlangen DM, Schneider KA, Schoenecker J, Senger AL, Starr WC, et al. Effect of  
367 glenohumeral elevation on subacromial supraspinatus compression risk during simulated reaching.  
368 *Journal of Orthopaedic Research*. 2017;35(10):2329-37.
- 369 16. Lawrence RL, Sessions WC, Jensen MC, Staker JL, Eid A, Breighner R, et al. The effect of  
370 glenohumeral plane of elevation on supraspinatus subacromial proximity. *Journal of Biomechanics*.  
371 2018;79:147-54.
- 372 17. Giphart JE, van der Meijden OA, Millett PJ. The effects of arm elevation on the 3-dimensional  
373 acromiohumeral distance: a biplane fluoroscopy study with normative data. *Journal of shoulder and*  
374 *elbow surgery*. 2012;21(11):1593-600.
- 375 18. Koontz AM, Cooper RA, Boninger ML, Souza AL, Fay BT. Shoulder kinematics and kinetics during  
376 two speeds of wheelchair propulsion. *Journal of rehabilitation research and development*.  
377 2002;39(6):635-50.
- 378 19. Morrow MM, Kaufman KR, An KN. Scapula kinematics and associated impingement risk in  
379 manual wheelchair users during propulsion and a weight relief lift. *Clinical biomechanics*.  
380 2011;26(4):352-7.
- 381 20. Requejo P, Mulroy S, Haubert LL, Newsam C, Gronley J, Perry J. Evidence-based strategies to  
382 preserve shoulder function in manual wheelchair users with spinal cord injury. *Topics in Spinal Cord*  
383 *Injury Rehabilitation*. 2008;13(4):86-119.
- 384 21. El-Gohary M, McNames J. Shoulder and elbow joint angle tracking with inertial sensors. *IEEE*  
385 *Transactions on Biomedical Engineering*. 2012;59(9):2635-41.
- 386 22. Bouvier B, Duprey S, Claudon L, Dumas R, Savescu A. Upper Limb Kinematics Using Inertial and  
387 Magnetic Sensors: Comparison of Sensor-to-Segment Calibrations. *Sensors (Basel)*. 2015;15(8):18813-  
388 33.
- 389 23. Cutti AG, Giovanardi A, Rocchi L, Davalli A, Sacchetti R. Ambulatory measurement of shoulder  
390 and elbow kinematics through inertial and magnetic sensors. *Med Biol Eng Comput*. 2008;46(2):169-78.
- 391 24. Kirking B, El-Gohary M, Kwon Y. The feasibility of shoulder motion tracking during activities of  
392 daily living using inertial measurement units. *Gait & posture*. 2016;49:47-53.
- 393 25. Chapman RM, Torchia MT, Bell J-E, Van Citters DW. Continuously monitoring shoulder motion  
394 after total shoulder arthroplasty: maximum elevation and time spent above 90° of elevation are critical  
395 metrics to monitor. *Journal of shoulder and elbow surgery*. 2019.
- 396 26. Langohr GDG, Haverstock JP, Johnson JA, Athwal GS. Comparing daily shoulder motion and  
397 frequency after anatomic and reverse shoulder arthroplasty. *Journal of shoulder and elbow surgery*.  
398 2018;27(2):325-32.
- 399 27. Hudak PL, Amadio PC, Bombardier C, Beaton D, Cole D, Davis A, et al. Development of an upper  
400 extremity outcome measure: the DASH (disabilities of the arm, shoulder, and hand). *American journal of*  
401 *industrial medicine*. 1996;29(6):602-8.

- 402 28. Beaton DE, Katz JN, Fossel AH, Wright JG, Tarasuk V, Bombardier C. Measuring the whole or the  
403 parts?: Validity, reliability, and responsiveness of the disabilities of the arm, shoulder and hand outcome  
404 measure in different regions of the upper extremity. *Journal of Hand Therapy*. 2001;14(2):128-42.
- 405 29. Curtis K, Roach K, Applegate EB, Amar T, Benbow C, Genecco T, et al. Development of the  
406 wheelchair user's shoulder pain index (WUSPI). *Spinal Cord*. 1995;33(5):290.
- 407 30. Curtis K, Roach K, Applegate E, Amar T, Benbow C, Genecco T, et al. Reliability and validity of the  
408 wheelchair user's shoulder pain index (WUSPI). *Spinal Cord*. 1995;33(10):595.
- 409 31. Sabatini AM. Quaternion-based extended Kalman filter for determining orientation by inertial  
410 and magnetic sensing. *IEEE Transactions on Biomedical Engineering*. 2006;53(7):1346-56.
- 411 32. Madgwick S. An efficient orientation filter for inertial and inertial/magnetic sensor arrays.  
412 Report x-io and University of Bristol (UK). 2010;25:113-8.
- 413 33. McGinnis RS, Cain SM, Davidson SP, Vitali RV, McLean SG, Perkins N, editors. Validation of  
414 complementary filter based IMU data fusion for tracking torso angle and rifle orientation. ASME  
415 International Mechanical Engineering Congress and Exposition; 2014: American Society of Mechanical  
416 Engineers.
- 417 34. McGinnis RS, Cain SM, Tao S, Whiteside D, Goulet GC, Gardner EC, et al. Accuracy of femur  
418 angles estimated by IMUs during clinical procedures used to diagnose femoroacetabular impingement.  
419 *IEEE Transactions on Biomedical Engineering*. 2015;62(6):1503-13.
- 420 35. Savage PG. Strapdown inertial navigation integration algorithm design part 1: Attitude  
421 algorithms. *Journal of guidance, control, and dynamics*. 1998;21(1):19-28.
- 422 36. Seel T, Schauer T, Raisch J, editors. Joint axis and position estimation from inertial measurement  
423 data by exploiting kinematic constraints. 2012 IEEE International Conference on Control Applications;  
424 2012: IEEE.
- 425 37. Vitali R, Cain S, McGinnis R, Zaferiou A, Ojeda L, Davidson S, et al. Method for estimating three-  
426 dimensional knee rotations using two inertial measurement units: Validation with a coordinate  
427 measurement machine. *Sensors (Basel)*. 2017;17(9):1970.
- 428 38. Kessel L, Watson M. The painful arc syndrome. Clinical classification as a guide to management.  
429 *The Journal of bone and joint surgery British volume*. 1977;59(2):166-72.
- 430 39. McAtamney L, Corlett EN. RULA: a survey method for the investigation of work-related upper  
431 limb disorders. *Applied ergonomics*. 1993;24(2):91-9.
- 432 40. Lugade V, Fortune E, Morrow M, Kaufman K. Validity of using tri-axial accelerometers to  
433 measure human movement - Part I: Posture and movement detection. *Med Eng Phys*. 2014;36(2):169-  
434 76.
- 435 41. Goodwin BM, Fortune E, Van Straaten MG, Morrow MM. Outcome Measures of Free-Living  
436 Activity in Spinal Cord Injury Rehabilitation. *Current Physical Medicine and Rehabilitation Reports*.  
437 2019:1-6.



- 438 42. Sonenblum SE, Sprigle S, Lopez RA. Manual wheelchair use: bouts of mobility in everyday life.  
439 Rehabilitation research and practice. 2012;2012.
- 440 43. Tolerico ML, Ding D, Cooper RA, Spaeth DM. Assessing mobility characteristics and activity levels  
441 of manual wheelchair users. Journal of rehabilitation research and development. 2007;44(4):561.
- 442 44. Collinger JL, Boninger ML, Koontz AM, Price R, Sisto SA, Tolerico ML, et al. Shoulder  
443 biomechanics during the push phase of wheelchair propulsion: a multisite study of persons with  
444 paraplegia. Archives of physical medicine and rehabilitation. 2008;89(4):667-76.
- 445 45. Rao SS, Bontrager EL, Gronley JK, Newsam CJ, Perry J. Three-dimensional kinematics of  
446 wheelchair propulsion. IEEE Transactions on Rehabilitation Engineering. 1996;4(3):152-60.
- 447 46. Collins SH, Adamczyk PG, Kuo AD. Dynamic arm swinging in human walking. Proceedings of the  
448 Royal Society B: Biological Sciences. 2009;276(1673):3679-88.
- 449 47. Fortune E, Cloud-Biebl BA, Madansingh SI, Ngufor CG, Van Straaten MG, Goodwin BM, et al.  
450 Estimation of manual wheelchair-based activities in the free-living environment using a neural network  
451 model with inertial body-worn sensors. Journal of electromyography and kinesiology. 2019.
- 452 48. Chapman RM, Torchia MT, Bell J-E, Van Citters DW. Assessing shoulder biomechanics of healthy  
453 elderly individuals during activities of daily living using inertial measurement units: high maximum  
454 elevation is achievable but rarely used. Journal of biomechanical engineering. 2019;141(4):041001.
- 455 49. Schneider S, Popp WL, Brogioli M, Albisser U, Demkó L, Debecker I, et al. Reliability of wearable-  
456 sensor-derived measures of physical activity in wheelchair-dependent spinal cord injured patients.  
457 Frontiers in neurology. 2018;9:1039.
- 458
